# Supplementary material for: Validation of cadaver-based trauma surgery training for lifelong skill development
Source: Research Square preprint supplement (doi:10.21203/rs.3.rs-6108540/v1), 2025-04-03
Supplement: Supplementary file 1 [file aa461402be412837db201ddc.xlsx]

## Sheet: Table 1
Table 1: SACL Values and Changes for Each Surgical Technique
Surgical Procedure			SACL Median [Interquartile Range]						SACL Change Average [Min, Max]]						type of change in SACL
			Pre-course		Post-course		6-month later		Pre vs. Post		Pre vs. 6-month later		Post vs. 6-month later
Basic Technique
	①	Cricothyroidotomy	8.0 [5.0-10.0]		9.0 [8.0-10.0]		9.0 [8.0-10.0]		1.3 [-2.0, 7.0]		1.2 [-2.0, 6.0]		-0.1 [-5.0, 4.0]		A
			7.0 [5.0-9.0]	]*	8.0 [7.0-10.0]	]*	8.0 [6.3-10.0]	]*	1.9 [-2.0, 7.0]	]*	1.7 [-2.0, 6.0]	]*	-0.2 [-3.0, 4.0]		A
			10.0 [8.0-10.0]		10.0 [8.5-10.0]		10.0 [9.0-10.0]		0.5 [-2.0, 5.0]		0.5 [-2.0, 5.0]		0.0 [-5.0, 4.0]		C
	②	Chest tube insertion	10.0 [8.0-10.0]		10.0 [9.0-10.0]		10.0 [9.0-10.0]		0.3 [-2.0, 4.0]		0.3 [-2.0, 5.0]		0.1 [-3.0, 3.0]		C
			10.0 [8.0-10.0]	]*	10.0 [9.0-10.0]		10.0 [8.3-10.0]	]*	0.5 [-2.0, 4.0]	]*	0.4 [-2.0, 5.0]		0.0 [-3.0, 3.0]		C
			10.0 [10.0-10.0]		10.0 [9.5-10.0]		10.0 [10.0-10.0]		0.0 [-2.0, 3.0]		0.2 [-2.0, 3.0]		0.2 [-2.0, 3.0]		C
Injuries to the Extremities
	③	Fasciotomy of the lower extremity	5.0 [1.0-6.0]		7.0 [5.0-8.0]		6.0 [4.0-8.0]		2.1 [-4.0, 8.0]		1.6 [-3.0, 10.0]		-0.5 [-5.0, 4.0]		A
			3.0 [0.0-5.0]	]*	5.5 [4.0-7.8]	]*	5.0 [3.3-6.0]	]*	2.7 [-4.0, 8.0]	]*	1.9 [-3.0, 7.0]	]*	-0.8 [-5.0, 4.0]	]*	A
			5.0 [5.0-8.5]		8.0 [6.5-8.0]		8.0 [5.0-9.0]		1.3 [-3.0, 8.0]		1.2 [-2.0, 10.0]		-0.1 [-4.0, 3.0]		A
Vascular Trauma
	④	Exposure of femoral vessels	5.0 [3.0-8.0]		7.0 [5.0-9.0]		7.0 [5.0-9.0]		1.5 [-8.0, 7.0]		1.4 [-2.0, 8.0]		-0.1 [-4.0, 6.0]		A
			4.0 [2.0-6.0]	]*	6.0 [5.0-7.0]	]*	5.0 [4.3-8.0]	]*	1.9 [-2.0, 6.0]	]*	1.6 [-2.0, 8.0]	]*	-0.3 [-4.0, 4.0]		A
			8.0 [5.0-10.0]		8.0 [7.0-10.0]		9.0 [6.5-10.0]		1.0 [-8.0, 7.0]		1.0 [-2.0, 7.0]		0.1 [-3.0, 6.0]		A
	⑤	Exposure of neck vessels	5.0 [2.0-7.0]		7.0 [5.0-8.0]		6.0 [5.0-8.0]		2.0 [-4.0, 10.0]		1.7 [-3.0, 8.0]		-0.3 [-4.0, 5.0]		A
			3.0 [0.3-5.0]	]*	6.0 [5.0-7.0]	]*	5.0 [4.0-6.8]	]*	2.4 [-2.0, 8.0]	]*	1.9 [-3.0, 6.0]		-0.5 [-4.0, 3.0]		A
			6.0 [4.0-10.0]		8.0 [7.0-10.0]		8.0 [6.0-10.0]		1.5 [-4.0, 10.0]		1.4 [-3.0, 8.0]		-0.1 [-3.0, 5.0]		A
	⑥	Vascular repair (direct suture, patch repair, end-to-end anastomosis, shunting)	3.0 [1.0-6.0]		6.0 [4.0-7.0]		5.0 [3.0-7.0]		2.0 [-2.0, 8.0]		1.8 [-2.0, 9.0]		-0.2 [-5.0, 6.0]		A
			1.0 [0.0-3.0]	]*	5.0 [3.0-6.0]	]*	4.5 [3.0-6.0]	]*	2.4 [-1.0, 7.0]	]*	2.2 [-1.0, 9.0]	]*	-0.2 [-5.0, 6.0]		A
			5.0 [3.0-9.0]		7.0 [6.0-9.0]		7.0 [5.0-8.0]		1.4 [-2.0, 8.0]		1.2 [-2.0, 8.0]		-0.2 [-3.0, 3.0]		A
Thoracic Trauma
	⑦	Pericardial window technique	5.0 [2.0-8.0]		7.0 [5.0-9.0]		7.0 [5.0-9.0]		1.8 [-3.0, 8.0]		1.7 [-3.0, 8.0]		-0.1 [-6.0, 4.0]		A
			4.0 [0.3-5.0]	]*	6.0 [5.0-8.0]	]*	5.5 [4.3-8.0]	]*	2.3 [-2.0, 8.0]	]*	2.2 [-2.0, 7.0]	]*	-0.1 [-4.0, 4.0]		A
			8.0 [5.0-10.0]		8.0 [6.0-10.0]		8.0 [6.0-10.0]		1.2 [-3.0, 8.0]		1.1 [-3.0, 8.0]		-0.1 [-6.0, 3.0]		A
	⑧	Left anterior thoracotomy & aortic clamping	6.0 [2.0-10.0]		8.0 [6.0-9.0]		8.0 [5.0-10.0]		1.4 [-3.0, 8.0]		1.5 [-5.0, 8.0]		0.0 [-3.0, 5.0]		A
			5.0 [1.3-8.0]	]*	7.0 [5.0-8.0]	]*	6.5 [5.0-8.0]	]*	1.6 [-2.0, 7.0]		1.6 [-5.0, 7.0]		0.0 [-3.0, 4.0]		A
			8.0 [5.0-10.0]		8.0 [7.0-10.0]		9.0 [7.5-10.0]		1.2 [-3.0, 8.0]		1.3 [-3.0, 8.0]		0.1 [-2.0, 5.0]		A
	⑨	Bilateral anterior thoracotomy (clam shell)	5.0 [1.0-8.0]		7.0 [5.0-9.0]		7.0 [5.0-9.0]		1.9 [-3.0, 8.0]		1.7 [-2.0, 8.0]		-0.3 [-5.0, 5.0]		A
			4.0 [0.0-6.0]	]*	6.0 [5.0-8.0]	]*	5.0 [4.0-8.0]	]*	2.3 [-2.0, 8.0]	]*	1.9 [-2.0, 8.0]	]*	-0.4 [-5.0, 3.0]		A
			8.0 [3.5-10.0]		8.0 [6.5-10.0]		9.0 [6.5-10.0]		1.4 [-3.0, 8.0]		1.4 [-2.0, 8.0]		-0.1 [-4.0, 5.0]		A
	⑩	Pulmonary hilar clamping	5.0 [1.0-8.0]		7.0 [5.0-8.0]		6.0 [4.0-8.0]		1.9 [-3.0, 10.0]		1.7 [-3.0, 8.0]		-0.2 [-5.0, 4.0]		A
			2.0 [0.0-5.0]	]*	5.5 [3.3-7.0]	]*	5.0 [3.0-7.8]	]*	2.3 [-2.0, 10.0]	]*	2.0 [-3.0, 8.0]	]*	-0.3 [-5.0, 4.0]		A
			7.0 [3.0-10.0]		8.0 [6.5-10.0]		8.0 [6.0-10.0]		1.3 [-3.0, 8.0]		1.4 [-2.0, 8.0]		0.0 [-3.0, 3.0]		A
	⑪	Pulmonary injury	5.0 [1.0-7.0]		7.0 [5.0-8.0]		6.0 [4.0-8.0]		2.2 [-4.0, 10.0]		1.8 [-2.0, 8.0]		-0.4 [-6.0, 5.0]		A
			2.0 [0.0-5.0]	]*	6.0 [4.3-8.0]	]*	5.0 [3.0-7.0]	]*	2.8 [-4.0, 6.0]	]*	2.1 [-2.0, 6.0]	]*	-0.6 [-6.0, 4.0]		A
			6.0 [4.0-9.5]		8.0 [6.0-10.0]		8.0 [5.0-10.0]		1.5 [-2.0, 10.0]		1.3 [-2.0, 8.0]		-0.2 [-3.0, 5.0]		A
	⑫	Atrial injury	3.0 [0.0-5.0]		6.0 [3.0-7.0]		5.0 [3.0-7.0]		2.0 [-3.0, 8.0]		1.5 [-3.0, 8.0]		-0.5 [-5.0, 4.0]		A
			1.0 [0.0-4.0]	]*	5.0 [3.0-6.0]	]*	4.0 [2.0-5.0]	]*	2.3 [-3.0, 6.0]	]*	1.7 [-2.0, 6.0]		-0.6 [-5.0, 4.0]		A
			5.0 [2.0-8.5]		7.0 [5.5-8.0]		7.0 [5.0-8.0]		1.6 [-2.0, 8.0]		1.2 [-3.0, 8.0]		-0.4 [-4.0, 4.0]		A
	⑬	Ventricular injury	3.0 [0.0-5.0]		6.0 [3.0-7.0]		5.0 [3.0-7.0]		2.1 [-3.0, 8.0]		1.6 [-4.0, 8.0]		-0.4 [-5.0, 4.0]		A
			1.5 [0.0-4.0]	]*	5.0 [3.0-6.0]	]*	4.0 [2.0-5.0]	]*	2.3 [-3.0, 6.0]	]*	1.8 [-3.0, 7.0]		-0.5 [-5.0, 4.0]		A
			5.0 [2.0-8.0]		7.0 [5.5-8.0]		7.0 [5.0-8.0]		1.8 [-2.0, 8.0]		1.4 [-4.0, 8.0]		-0.3 [-3.0, 4.0]		A
Abdominal & Pelvic Trauma
	⑭	Trauma laparotomy	6.0 [3.0-10.0]		8.0 [6.0-10.0]		8.0 [5.0-10.0]		1.5 [-3.0, 9.0]		1.3 [-4.0, 9.0]		-0.3 [-6.0, 4.0]		A
			5.0 [1.3-6.8]	]*	7.0 [5.0-8.8]	]*	6.0 [4.0-8.0]	]*	2.3 [-2.0, 9.0]	]*	1.8 [-4.0, 9.0]	]*	-0.6 [-6.0, 3.0]	]*	A
			9.0 [7.0-10.0]		10.0 [8.0-10.0]		10.0 [8.0-10.0]		0.5 [-3.0, 5.0]		0.7 [-1.0, 5.0]		0.2 [-3.0, 4.0]		C
	⑮	Portal triad clamping (Pringle’s maneuver)	5.0 [2.0-8.0]		8.0 [5.0-10.0]		7.0 [5.0-10.0]		1.7 [-4.0, 8.0]		1.5 [-5.0, 6.0]		-0.2 [-5.0, 3.0]		A
			4.5 [1.0-6.0]	]*	7.0 [5.0-8.0]	]*	5.0 [4.0-8.0]	]*	2.3 [-4.0, 8.0]	]*	1.9 [-5.0, 6.0]	]*	-0.4 [-5.0, 3.0]	]*	A
			8.0 [6.0-10.0]		10.0 [8.0-10.0]		10.0 [8.0-10.0]		0.8 [-2.0, 5.0]		1.0 [-1.0, 5.0]		0.1 [-2.0, 2.0]		B
	⑯	Liver packing	6.0 [3.0-8.0]		8.0 [6.0-9.0]		8.0 [5.0-10.0]		1.6 [-2.0, 9.0]		1.7 [-3.0, 8.0]		0.1 [-3.0, 3.0]		A
			5.0 [1.0-6.0]	]*	7.0 [5.0-8.0]	]*	7.0 [5.0-8.0]	]*	2.4 [-2.0, 9.0]	]*	2.4 [-3.0, 8.0]	]*	0.0 [-3.0, 3.0]		A
			8.0 [7.0-10.0]		8.0 [7.5-10.0]		9.0 [8.0-10.0]		0.6 [-2.0, 5.0]		0.8 [-2.0, 5.0]		0.2 [-2.0, 2.0]		C
	⑰	Left medial visceral rotation (Mattox maneuver)	4.0 [0.0-7.0]		7.0 [4.0-8.0]		6.0 [4.0-9.0]		1.9 [-2.0, 10.0]		1.9 [-1.0, 10.0]		0.0 [-4.0, 5.0]		A
			2.0 [0.0-5.0]	]*	5.0 [3.0-7.0]	]*	5.0 [3.0-7.0]	]*	2.4 [-2.0, 10.0]	]*	2.3 [-1.0, 10.0]	]*	-0.1 [-4.0, 5.0]		A
			7.0 [4.5-10.0]		8.0 [6.5-10.0]		8.0 [7.0-10.0]		1.3 [-2.0, 10.0]		1.4 [-1.0, 10.0]		0.1 [-2.0, 2.0]		A
	⑱	Right medial visceral rotation (Cattell–Braasch maneuver)	4.0 [0.0-7.0]		7.0 [4.0-8.0]		6.0 [4.0-9.0]		2.0 [-2.0, 10.0]		1.9 [-1.0, 10.0]		0.0 [-4.0, 5.0]		A
			2.0 [0.0-5.0]	]*	5.0 [3.0-7.0]	]*	5.0 [3.0-6.8]	]*	2.5 [-2.0, 10.0]	]*	2.4 [-1.0, 10.0]	]*	-0.1 [-4.0, 5.0]		A
			7.0 [4.5-10.0]		8.0 [6.5-10.0]		8.0 [7.0-10.0]		1.3 [-2.0, 10.0]		1.4 [-1.0, 10.0]		0.1 [-2.0, 2.0]		A
	⑲	Nephrectomy	3.0 [0.0-7.0]		6.0 [3.0-8.0]		5.0 [3.0-8.0]		1.7 [-3.0, 10.0]		1.7 [-3.0, 10.0]		0.0 [-5.0, 9.0]		A
			1.0 [0.0-4.0]	]*	5.0 [2.3-6.0]	]*	4.0 [3.0-6.0]	]*	2.2 [-2.0, 10.0]	]*	2.2 [-2.0, 10.0]	]*	0.0 [-4.0, 9.0]		A
			7.0 [3.0-9.5]		8.0 [5.0-10.0]		8.0 [5.5-9.5]		1.2 [-3.0, 10.0]		1.1 [-3.0, 10.0]		-0.1 [-5.0, 2.0]		A
	⑳	Abdominal damage control technique	5.0 [2.0-8.0]		7.0 [5.0-9.0]		7.0 [5.0-9.0]		1.7 [-4.0, 10.0]		1.6 [-3.0, 10.0]		-0.1 [-5.0, 5.0]		A
			4.0 [1.0-5.8]	]*	6.0 [4.0-8.0]	]*	5.0 [4.0-7.8]	]*	2.3 [-2.0, 9.0]	]*	2.0 [-3.0, 7.0]	]*	-0.3 [-5.0, 5.0]		A
			8.0 [5.0-9.5]		8.0 [7.0-10.0]		9.0 [7.0-10.0]		0.9 [-4.0, 10.0]		1.1 [-3.0, 10.0]		0.2 [-2.0, 3.0]		B
	㉑	Pelvic packing	5.0 [2.0-7.0]		7.0 [5.0-9.0]		7.0 [5.0-9.0]		2.1 [-6.0, 10.0]		2.0 [-5.0, 10.0]		-0.1 [-5.0, 6.0]		A
			3.0 [1.0-5.0]	]*	6.0 [5.0-8.0]	]*	5.0 [4.0-7.8]	]*	2.7 [-6.0, 9.0]	]*	2.4 [-5.0, 8.0]	]*	-0.3 [-5.0, 3.0]		A
			7.0 [5.0-10.0]		8.0 [7.0-10.0]		9.0 [7.0-10.0]		1.5 [-5.0, 10.0]		1.6 [-3.0, 10.0]		0.1 [-5.0, 6.0]		A
Sum of all items
			100.0 [54.0-144.0]		149.0 [115.0-172.0]		136.0 [104.0-173.0]		36.8 [-46.0, 144.0]		33.2 [-23.0, 142.0]		-3.6 [-67.0, 59.0]
			74.0 [30.5-113.0]	]*	134.0 [92.3-151.8]	]*	114.5 [85.8-148.5]	]*	46.8 [-46.0, 132.0]	]*	40.5 [-14.0, 106.0]	]*	-6.3 [-67.0, 48.0]
			138.0 [94.0-199.5]		167.0 [147.5-194.0]		172.0 [136.5-198.5]		23.8 [-42.0, 144.0]		23.6 [-23.0, 142.0]		-0.2 [-39.0, 59.0]
										*	p<0.05		whole
													novice
													experienced
